# Supplementary material for: A Qualitative Study of Self-Efficacy-Related Experiences and Needs in Postoperative Self- Management Among Patients with Advanced Gastric Cancer
Source: Research Square preprint supplement (doi:10.21203/rs.3.rs-7274719/v1), 2025-08-21
Supplement: Supplementary file 1 [file 2a7b8a458ce2d6c64e0c0121.docx]

**Appendix 1:** Qualitative Interview Guide on Patient Self-Management

Based on the review of the literature and discussions within the research team, the preliminary interview guide is as follows:

1. How do you pay attention to your own health status? Could you describe your experience of being diagnosed with gastric cancer?
2. During your postoperative recovery and rehabilitation at home, what difficulties have you encountered in caring for yourself? What specific kinds of care or support would you like to receive?
3. How much do you know about nutritional management? How are you currently planning or managing your nutrition and diet?
4. Through what channels do you obtain information about self-health management? Do these sources meet your needs?
5. During your illness, what emotional ups and downs have you experienced? Have you received psychological support from your family or other sources?

**Appendix 2: Consolidated criteria for reporting qualitative studies (COREQ): 32-item checklist**

| **Topic** | **Item No.** | **Guide questions/description** | **Reported in**  **section** |
| --- | --- | --- | --- |
| **Domain 1: Research team and reﬂexivity** | | | |
| *Personal Characteristics* | | | |
| Interviewer/facilitator | 1 | Which author/s conducted the interview or focus group? | 2.3 |
| Credentials | 2 | What were the researcher’s credentials? E.g. PhD, MD | 2.6 |
| Occupation | 3 | What was their occupation at the time of the study? | 2.6 |
| Gender | 4 | Was the researcher male or female? | 2.6 |
| Experience and training | 5 | What experience or training did the researcher have? | 2.6 |
| *Relationship with participants* | | | |
| Relationship established | 6 | Was a relationship established prior to study commencement? | 2.2 |
| Participant knowledge of the interviewer | 7 | What did the participants know about the researcher? e.g. personal goals, reasons for doing the research | 2.2 |
| Interviewer characteristics | 8 | What characteristics were reported about the interviewer/facilitator? e.g. Bias, assumptions, reasons and interests in the research topic | 2.2, 2.6 |
| **Domain 2: study design** | | | |
| *Theoretical framework* | | | |
| Methodological orientation and Theory | 9 | What methodological orientation was stated to underpin the study? e.g. grounded theory, discourse analysis, ethnography, phenomenology, content analysis | 2.1 |
| *Participant selection* | | | |
| Sampling | 10 | How were participants selected? e.g. purposive, convenience, consecutive, snowball | 2.2 |
| Method of approach | 11 | How were participants approached? e.g. face-to-face, telephone, mail, email | 2.3 |
| Sample size | 12 | How many participants were in the study? | 3.1 |
| Non-participation | 13 | How many people refused to participate or dropped out? Reasons? | 3.1 |
| *Setting* | | | |
| Setting of data collection | 14 | Where was the data collected? e.g. home, clinic, workplace | 2.3 |
| Presence of non-participants | 15 | Was anyone else present besides the participants and researchers? | 2.2 |
| Description of sample | 16 | What are the important characteristics of the sample? e.g. demographic data, date | 3.1 |
| *Data collection* | | | |
| Interview guide | 17 | Were questions, prompts, guides provided by the authors? Was it pilot tested? | 2.2 |
| Repeat interviews | 18 | Were repeat interviews carried out? If yes, how many? | 2.3 |
| Audio/visual recording | 19 | Did the research use audio or visual recording to collect the data? | 2.3 |
| Field notes | 20 | Were ﬁeld notes made during and/or after the interview or focus group? | 2.3 |
| Duration | 21 | What was the duration of the interviews or focus group? | 2.3 |
| Data saturation | 22 | Was data saturation discussed? | 2.2 |
| Transcripts returned | 23 | Were transcripts returned to participants for comment and/or correction? | 2.4 |
| **Domain 3: analysis and findings** | | | |
| *Data analysis* | | | |
| Number of data coders | 24 | How many data coders coded the data? | 2.4 |
| Description of the coding tree | 25 | Did authors provide a description of the coding tree? | 3.2 |
| Derivation of themes | 26 | Were themes identiﬁed in advance or derived from the data? | 2.4 |
| Software | 27 | What software, if applicable, was used to manage the data? | 2.4 |
| Participant checking | 28 | Did participants provide feedback on the ﬁndings? | 2.4. |
| *Reporting* | | | |
| Quotations presented | 29 | Were participant quotations presented to illustrate the themes/ﬁndings? Was each quotation identiﬁed? e.g. participant number | 3.2 |
| Data and ﬁndings consistent | 30 | Was there consistency between the data presented and the ﬁndings? | 3.2 |
| Clarity of major themes | 31 | Were major themes clearly presented in the ﬁndings? | 3.2 |
| Clarity of minor themes | 32 | Is there a description of diverse cases or discussion of minor themes? | 3.2 |

Developed from: Tong A, Sainsbury P, Craig J. Consolidated criteria for reporting qualitative research (COREQ): a 32-item checklist for interviews and focus groups. *International Journal for Quality in Health Care*. 2007. Volume 19, Number 6: pp. 349 – 35
